# Supplementary material
Source: publisher site journal article supplement (https://www.dovepress.com/article/318110)
Supplement: Supplementary file 1 [file get_supplementary_file.php]

**Supplementary material**

**Student’s Weekly Report Template**

Student Name: Site:

Week Number:

Hours Worked:

Activities: Describe the nature of the work you have been doing/Describe weekly experience

1.

2.

3.

Observations

1.

2.

3.

Planning For Next Week

1.

2.

Challenges /concerns you may have

Recommendations and suggestions

Conclusion
